# Supplementary material for: Baseline Pneumococcal IgG Levels and Response to 23-Valent Pneumococcal Polysaccharide Vaccine among Adults from Beijing, China
Source: MDPI journal article supplement (doi:10.3390/vaccines11121780), 2023-11-29
Supplement: s1 [file s1]

## **Supplemental materials**

# **Baseline Pneumococcal IgG Levels and Response to 23-Valent Pneumococcal Polysaccharide Vaccine among Adults from Beijing, China**

**Shanshan Zhou<sup>1</sup>, Min Lv<sup>1</sup>, Shuang Bai<sup>1</sup>, Weixin Chen<sup>1</sup>, Wei Zhao<sup>1</sup>, Jian Wang<sup>1</sup>, Ao Zhang<sup>1</sup>, Jing Li<sup>1</sup>, Hui Xie<sup>1</sup>, Yanqing Gao<sup>2</sup>, Dongmei Li<sup>2</sup> and Jiang Wu<sup>1,\*</sup>**

<sup>1</sup> Beijing Center for Disease Prevention and Control, No. 16, Hepingli Middle Street, Dongcheng District, Beijing 100013, China

<sup>2</sup> Daxing District Center for Disease Control and Prevention of Beijing, Beijing 102600, China

\* Correspondence: [wj81732@hotmail.com](mailto:wj81732@hotmail.com)

**Supplementary Table S1** The GMCs and 95% CIs for baseline anti-Pn IgG concentrations ( $\mu\text{g/mL}$ ) in adults over 18 years

| Serotype | Adult group |         |           | Elderly group |         |           | Male group |         |           | Female group |         |           | P value          |                |
|----------|-------------|---------|-----------|---------------|---------|-----------|------------|---------|-----------|--------------|---------|-----------|------------------|----------------|
|          | No          | Pre-GMC | 95% CI    | No            | Pre-GMC | 95% CI    | No         | Pre-GMC | 95% CI    | No           | Pre-GMC | 95% CI    | Adult vs Elderly | Male vs Female |
| 1        | 306         | 1.03    | 0.91-1.16 | 241           | 1.07    | 0.94-1.2  | 306        | 1.04    | 0.93-1.17 | 241          | 1.06    | 0.92-1.19 | NS               | NS             |
| 2        | 309         | 1.51    | 1.33-1.72 | 275           | 1.48    | 1.29-1.7  | 328        | 1.52    | 1.33-1.7  | 256          | 1.55    | 1.29-1.72 | NS               | NS             |
| 3        | 289         | 0.37    | 0.33-0.42 | 275           | 0.42    | 0.37-0.48 | 317        | 0.46    | 0.33-0.42 | 247          | 0.47    | 0.37-0.48 | <0.05            | NS             |
| 4        | 309         | 0.48    | 0.43-0.52 | 232           | 0.55    | 0.49-0.63 | 301        | 0.52    | 0.43-0.53 | 240          | 0.55    | 0.48-0.6  | NS               | NS             |
| 5        | 309         | 0.81    | 0.73-0.9  | 275           | 0.77    | 0.69-0.86 | 328        | 0.82    | 0.7-0.86  | 256          | 0.81    | 0.72-0.89 | NS               | NS             |
| 6B       | 304         | 1.61    | 1.46-1.78 | 275           | 1.82    | 1.64-2.02 | 325        | 1.60    | 1.44-1.75 | 254          | 1.87    | 1.68-2.08 | NS               | <0.05          |
| 7        | 309         | 1.06    | 0.94-1.19 | 254           | 1.57    | 1.38-1.78 | 317        | 1.22    | 1.04-1.31 | 246          | 1.40    | 1.23-1.61 | <0.001           | NS             |
| 8        | 305         | 2.47    | 2.23-2.73 | 269           | 2.61    | 2.38-2.87 | 322        | 2.49    | 2.26-2.74 | 252          | 2.59    | 2.35-2.86 | NS               | NS             |
| 9N       | 301         | 1.73    | 1.58-1.9  | 275           | 2.19    | 1.97-2.43 | 328        | 1.71    | 1.54-1.91 | 256          | 1.75    | 1.52-1.95 | <0.001           | NS             |
| 9V       | 309         | 1.35    | 1.21-1.51 | 275           | 2.25    | 2.01-2.52 | 323        | 1.85    | 1.69-2.03 | 253          | 2.05    | 1.85-2.28 | <0.01            | NS             |
| 10A      | 302         | 1.71    | 1.54-1.9  | 246           | 2.05    | 1.82-2.31 | 311        | 1.71    | 1.54-1.9  | 237          | 2.05    | 1.82-2.32 | <0.05            | <0.05          |
| 11A      | 309         | 2.06    | 1.84-2.29 | 268           | 2.15    | 1.91-2.41 | 323        | 2.02    | 1.81-2.26 | 254          | 2.20    | 1.96-2.46 | NS               | NS             |
| 12F      | 309         | 0.76    | 0.69-0.83 | 275           | 1.09    | 0.99-1.2  | 328        | 0.83    | 0.75-0.89 | 256          | 1.03    | 0.9-1.12  | <0.001           | <0.01          |
| 14       | 304         | 2.39    | 2.03-2.82 | 274           | 3.33    | 2.88-3.84 | 323        | 2.63    | 2.22-2.96 | 255          | 3.23    | 2.63-3.72 | <0.01            | NS             |
| 15B      | 302         | 3.19    | 2.86-3.57 | 275           | 3.95    | 3.5-4.46  | 325        | 3.21    | 2.89-3.58 | 252          | 4.00    | 3.53-4.53 | <0.01            | <0.05          |
| 17F      | 295         | 1.16    | 1.03-1.32 | 268           | 1.41    | 1.25-1.58 | 317        | 1.20    | 1.05-1.3  | 246          | 1.43    | 1.25-1.63 | <0.05            | <0.05          |
| 18C      | 296         | 1.53    | 1.38-1.71 | 275           | 1.78    | 1.6-1.98  | 322        | 1.52    | 1.35-1.64 | 249          | 1.87    | 1.67-2.11 | NS               | <0.01          |
| 19A      | 309         | 1.23    | 1.08-1.39 | 268           | 1.50    | 1.31-1.73 | 326        | 1.24    | 1.09-1.39 | 251          | 1.53    | 1.3-1.76  | <0.05            | <0.05          |
| 19F      | 295         | 2.23    | 2.02-2.46 | 275           | 2.51    | 2.25-2.79 | 320        | 2.14    | 1.96-2.35 | 250          | 2.66    | 2.37-3    | NS               | <0.01          |
| 20A      | 309         | 2.97    | 2.69-3.27 | 266           | 3.32    | 2.98-3.69 | 323        | 2.99    | 2.72-3.29 | 252          | 3.30    | 2.96-3.68 | NS               | NS             |
| 22F      | 280         | 0.70    | 0.62-0.8  | 225           | 0.96    | 0.85-1.1  | 279        | 0.83    | 0.69-0.9  | 226          | 0.86    | 0.73-0.96 | <0.001           | NS             |
| 23F      | 308         | 0.89    | 0.78-1    | 273           | 1.20    | 1.05-1.37 | 326        | 0.99    | 0.82-1.05 | 255          | 1.16    | 1-1.31    | <0.01            | <0.05          |
| 33F      | 301         | 2.69    | 2.43-2.97 | 275           | 3.59    | 3.22-4    | 325        | 2.89    | 2.6-3.2   | 251          | 3.36    | 3.02-3.74 | <0.001           | NS             |

**Supplementary Table S2** The equations and R2 of the linear regression model evaluating the relationship between baseline IgG titer and seroconversion rate

| Serotype | equation                 | R2     | P value |
|----------|--------------------------|--------|---------|
| 1        | $Y = -3.105 * X + 91.20$ | 0.9508 | <0.05   |
| 2        | $Y = -1.705 * X + 89.55$ | 0.9093 | <0.05   |
| 3        | $Y = -18.98 * X + 58.37$ | 0.9187 | <0.05   |
| 4        | $Y = -9.679 * X + 82.95$ | 0.8556 | <0.05   |
| 5        | $Y = -7.645 * X + 83.90$ | 0.9682 | <0.05   |
| 6B       | $Y = -5.964 * X + 81.12$ | 0.9234 | <0.05   |
| 7        | $Y = -5.827 * X + 95.82$ | 0.9156 | <0.05   |
| 8        | $Y = -2.850 * X + 84.78$ | 0.9305 | <0.05   |
| 9N       | $Y = -4.628 * X + 96.13$ | 0.9483 | <0.05   |
| 9V       | $Y = -3.040 * X + 85.98$ | 0.8637 | <0.05   |
| 10A      | $Y = -2.063 * X + 92.22$ | 0.8477 | <0.05   |
| 11A      | $Y = -3.273 * X + 76.31$ | 0.826  | <0.05   |
| 12F      | $Y = -10.57 * X + 72.94$ | 0.9751 | <0.05   |
| 14       | $Y = -1.998 * X + 83.71$ | 0.8429 | <0.05   |
| 15B      | $Y = -2.226 * X + 86.70$ | 0.9586 | <0.05   |
| 17F      | $Y = -3.599 * X + 90.57$ | 0.94   | <0.05   |
| 18C      | $Y = -3.613 * X + 87.00$ | 0.8276 | <0.05   |
| 19A      | $Y = -2.123 * X + 82.57$ | 0.9135 | <0.05   |
| 19F      | $Y = -3.699 * X + 78.11$ | 0.9726 | <0.05   |
| 20A      | $Y = -1.905 * X + 68.76$ | 0.7877 | <0.05   |
| 22F      | $Y = -5.504 * X + 79.69$ | 0.8562 | <0.05   |
| 23F      | $Y = -5.002 * X + 75.07$ | 0.8142 | <0.05   |
| 33F      | $Y = -1.726 * X + 96.59$ | 0.9324 | <0.05   |
